# Supplementary material
Source: publisher site journal article supplement (https://www.dovepress.com/article/317777)
Supplement: Supplementary file 1 [file get_supplementary_file.php]

## Supplementary Files

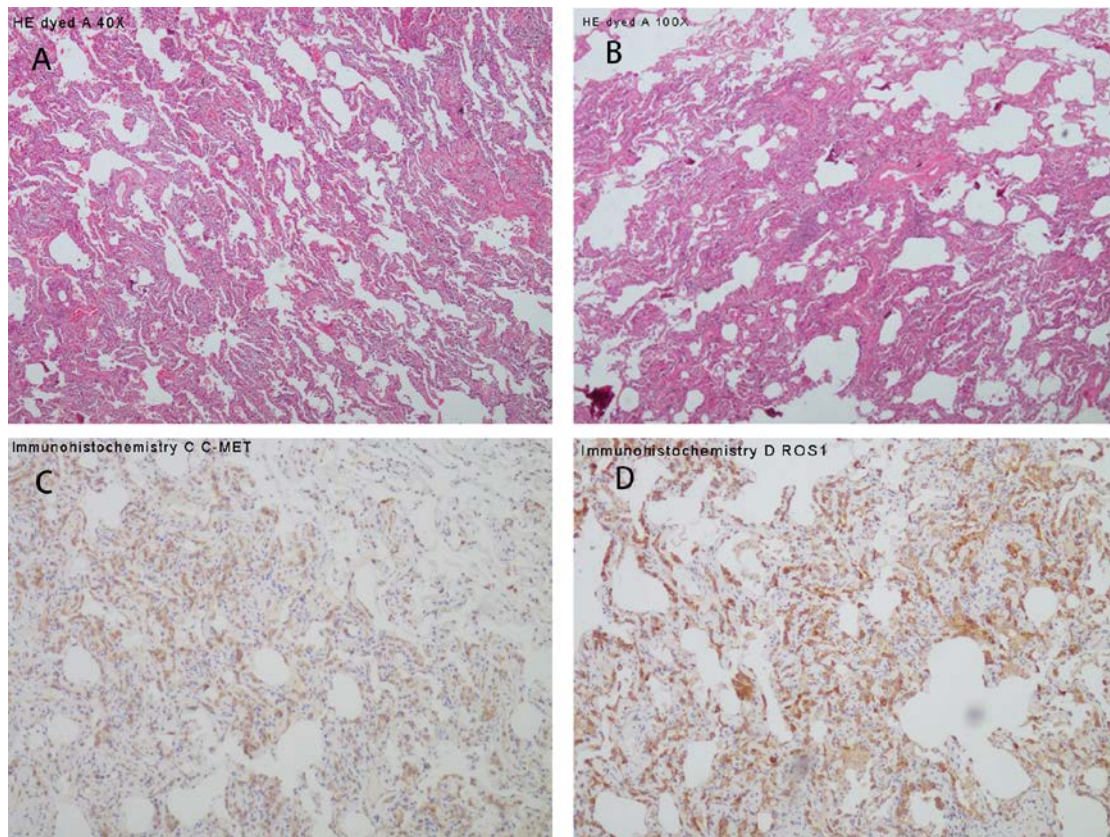

**Supplementary Figure 1** Postoperative pathology (HE dyed) of the pulmonary mass indicated microinvasive lung adenocarcinoma. Immunohistochemistry showed C-MET (+), ROS1 (+). HE dyed.

(A) 40X; (B) 100X Immunohistochemistry; (C) C-MET; (D) ROS1.

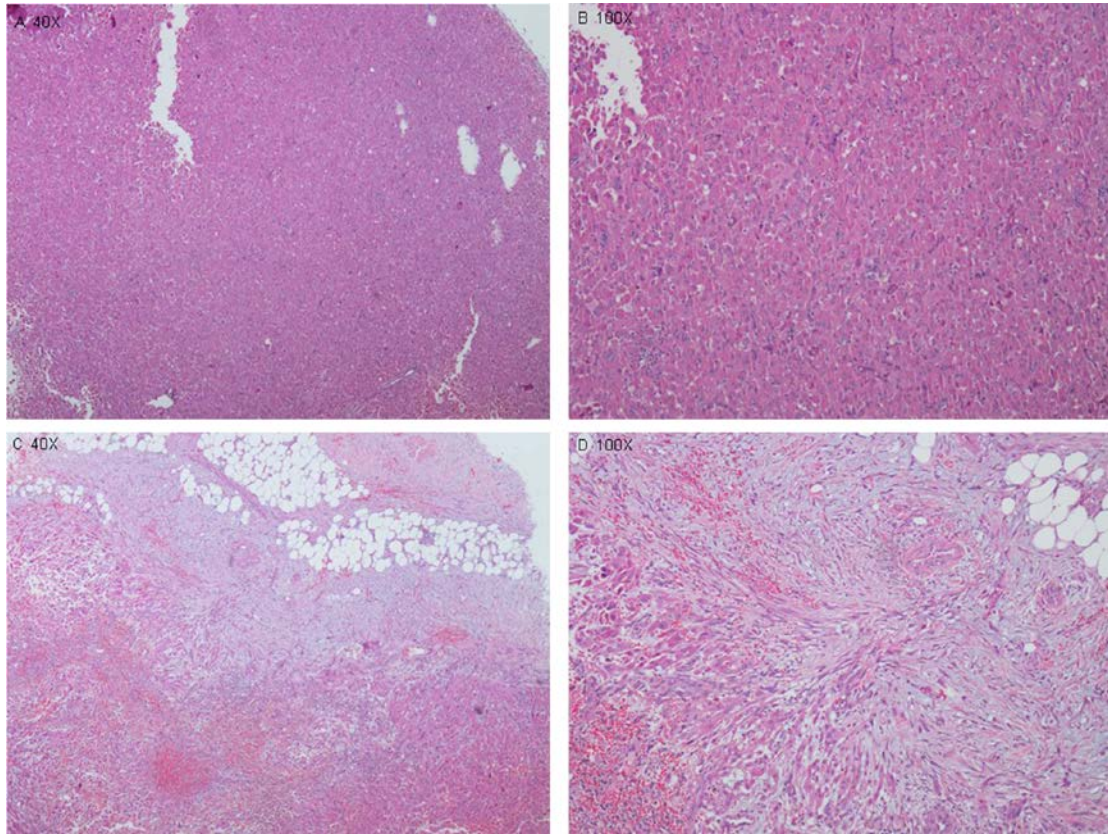

**Supplementary Figure 2** Histological specimen (HE dyed) showed the perirenal tumor was composed of cells with eosinophilic cytoplasm with moderate epithelioid appearance. (A) 40X; (B) 100X; (C) 40X; (D)100X.
